# Supplementary material for: SALL2 represses cyclins D1 and E1 expression and restrains G1/S cell cycle transition and cancer‐related phenotypes
Source: PubMed Central journal article supplement (PMC6026872; doi:10.1002/1878-0261.12308), 2018-05-21
Supplement: MOL2-12-1026-s006.pdf [file MOL2-12-1026-s006.pdf]

|                           | <i>SALL2/CCNE1</i> |                |          | <i>SALL2/CCND1</i> |                |          |               |
|---------------------------|--------------------|----------------|----------|--------------------|----------------|----------|---------------|
| <b>Cancer type</b>        | <b>r</b>           | <b>p Value</b> | <b>n</b> | <b>R</b>           | <b>p Value</b> | <b>n</b> | <b>GEO ID</b> |
| <b>Cervix Cancer</b>      | -0.440             | 4.0e-03        | 41       | 0.390              | 0.01           | 45       | GSE7803       |
| <b>Cervix Cancer</b>      | -0.393             | 1.1e-03        | 66       | 0.150              | 0.23           | 66       | GSE9750       |
| <b>Endometrial Cancer</b> | -0.560             | 1.8e-07        | 75       | -0.510             | 3.0e-06        | 75       | GSE11869      |
| <b>Glioblastoma</b>       | -0.410             | 2.0e-05        | 101      | -0.611             | 1.2e-11        | 101      | GSE4536       |
| <b>Glioblastoma</b>       | -0.316             | 7.6e-03        | 70       | 0.077              | 0.53           | 70       | GSE34271      |
| <b>Leukemia</b>           | -0.373             | 4.6e-03        | 56       | 0.316              | 0.02           | 56       | GSE4228       |
| <b>Leukemia</b>           | -0.026             | 0.24           | 2004     | -0.110             | 7.5e-07        | 2004     | GSE13159      |
| <b>Leukemia</b>           | -0.056             | 0.20           | 525      | 0.157              | 3.2e-04        | 525      | GSE14468      |
| <b>Lymphoma</b>           | -0.213             | 1.7e-03        | 215      | -0.040             | 0.56           | 215      | GSE4475       |
| <b>Lymphoma</b>           | -0.203             | 5.5e-04        | 287      | 0.043              | 0.46           | 287      | GSE23120      |
| <b>Lymphoma</b>           | -0.579             | 3.3e-04        | 34       | 0.372              | 0.03           | 34       | GSE34771      |
| <b>Osteosarcoma</b>       | 0.507              | 0.02           | 20       | -0.049             | 0.84           | 20       | GSE14359      |
| <b>Bladder Cancer</b>     | -0.016             | 0.90           | 60       | -0.332             | 9.6e-03        | 60       | GSE3167       |
| <b>Ovarian Cancer</b>     | -0.081             | 0.06           | 527      | 0.074              | 0.09           | 527      | GSE68661      |
| <b>Ovarian Cancer</b>     | -0.313             | 0.04           | 45       | -0.310             | 0.04           | 45       | GSE38666      |
| <b>Pancreatic Cancer</b>  | -0.441             | 1.9e-03        | 47       | -0.550             | 6.2e-05        | 47       | GSE17891      |
| <b>Breast Cancer</b>      | -0.494             | 8.0e-17        | 251      | 0.259              | 3.3e-05        | 251      | GSE3494       |
| <b>Breast Cancer</b>      | -0.322             | 6.3e-10        | 351      | 0.261              | 7.5e-07        | 351      | GSE2109       |
| <b>Breast Cancer</b>      | -0.407             | 4.9e-12        | 262      | 0.417              | 1.3e-12        | 262      | GSE21653      |
| <b>Breast Cancer</b>      | -0.349             | 1.3e-09        | 286      | 0.382              | 2.4e-11        | 286      | GSE2034       |
| <b>Colon Cancer</b>       | -0.275             | 3.4e-08        | 390      | -0.227             | 6.2e-06        | 390      | GSE41258      |
| <b>Colon Cancer</b>       | -0.267             | 1.5e-06        | 315      | 0.054              | 0.34           | 315      | GSE2109       |
| <b>Colon Cancer</b>       | -0.299             | 5.5e-04        | 130      | -0.218             | 0.01           | 130      | GSE37892      |
| <b>Kidney Cancer</b>      | -0.198             | 1.3e-03        | 261      | 0.031              | 0.62           | 261      | GSE2109       |
| <b>Liver Cancer</b>       | 0.262              | 0.01           | 90       | 0.159              | 0.13           | 90       | GSE15765      |
| <b>Lung Cancer</b>        | -0.439             | 7.5e-03        | 36       | -0.121             | 0.48           | 36       | GSE14018      |
| <b>Lung Cancer</b>        | -0.280             | 4.8e-03        | 100      | -0.014             | 0.89           | 100      | GSE33532      |
| <b>Lung Cancer</b>        | -0.255             | 1.6e-03        | 159      | 0.037              | 0.65           | 159      | GSE43580      |
| <b>Sarcoma</b>            | 0.220              | 0.02           | 117      | 0.727              | 1.7e-20        | 117      | GSE17679      |
| <b>Thyroid Cancer</b>     | -0.340             | 0.05           | 34       | 0.239              | 0.17           | 34       | GSE2109       |
| <b>Wilm's</b>             | -0.162             | 0.05           | 144      | -0.150             | 0.07           | 144      | GSE10320      |

**Supplementary Table 1. Inverse correlation between *SALL2* and *CCNE1/D1* expression in various cancers**
